# Supplementary material for: Measles Immunity Status of Greek Population after the Outbreak in 2017–2018: Results from a Seroprevalence National Survey
Source: MDPI journal article supplement (doi:10.3390/vaccines11071220), 2023-07-09
Supplement: s1 [file s1]

## Supplementary Material

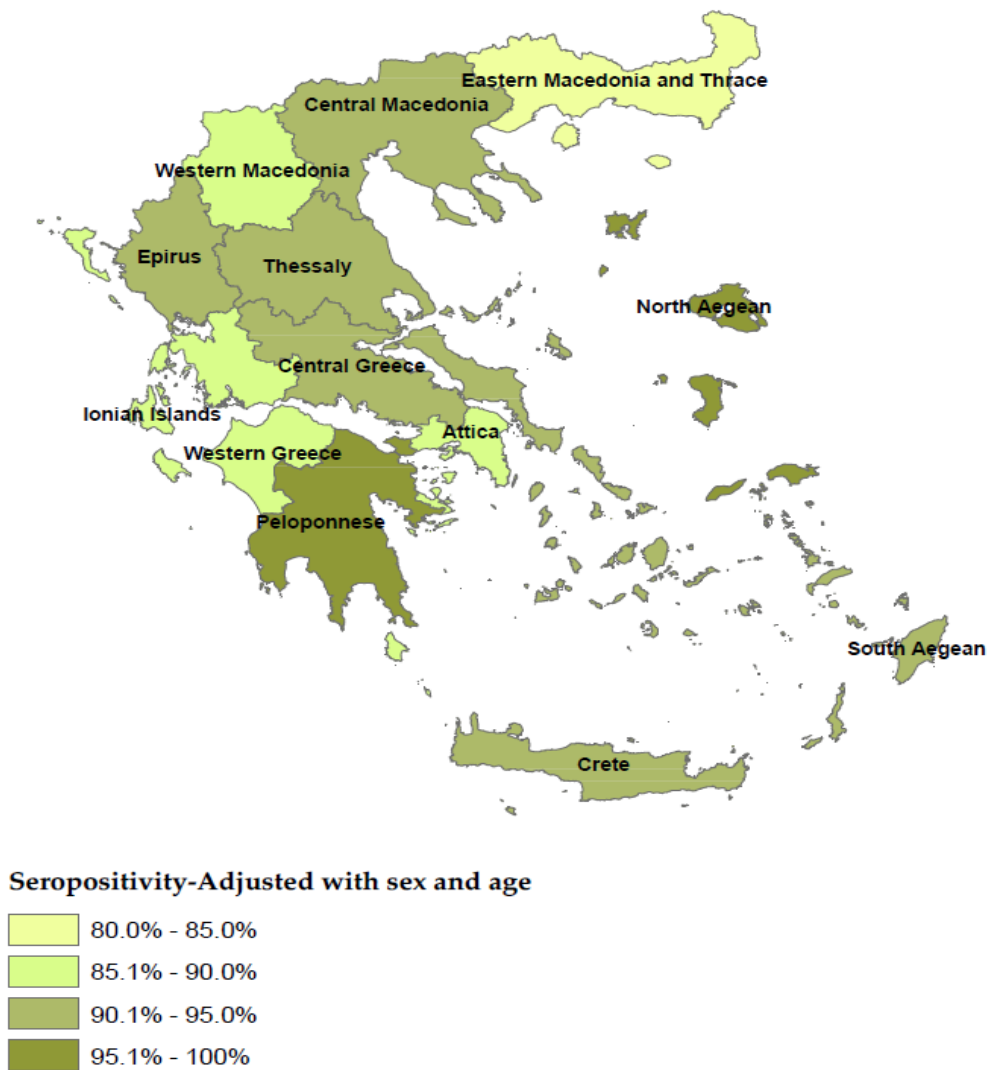

**Figure S1.** Adjusted seropositivity for anti-measles IgG antibodies per Region in Greece in a post measles outbreak period (NUTS level 2).
